# Supplementary material for: Changes in Serum Electrolytes, ECG, and Baroreflex Sensitivity during Combined Pituitary Stimulation Test
Source: Hindawi journal article supplement (doi:10.1155/2018/8692078), 2018-05-09
Supplement: f1 [file 8692078.f1.pdf]

Supplemental Table. 1. The associations between serum glucose levels and parameters.

| Parameters     | Fixed effects | 95% CI         | P value |
|----------------|---------------|----------------|---------|
| Na (mmol/L)    | -7.99         | -14.0 to -2.0  | 0.010   |
| K (mmol/L)     | -8.36         | -34.8 to 18.1  | 0.527   |
| Cl (mmol/L)    | -0.18         | -5.7 to 5.3    | 0.948   |
| Ca (mg/dL)     | -22.27        | -45.9 to 4.1   | 0.098   |
| iCa (mg/dL)    | -49.61        | -108.9 to 11.6 | 0.111   |
| QTc (ms)       | -0.42         | -0.8 to -0.1   | 0.032   |
| HR (beats/min) | -0.97         | -2.0 to 0.1    | 0.064   |
| BRS (%)        | -1.08         | -1.9 to -0.3   | 0.024   |

P-value and fixed effects were attained by likelihood ratio tests and linear mixed model.

CI, confidence interval; Na, serum sodium levels; K, serum potassium levels; Cl, serum chloride levels; Ca, serum calcium levels; iCa; ionized serum calcium levels; QTc, corrected QT intervals; HR, heart rate; BRS, baroreflex sensitivity.

Supplemental Fig. 1. Changes in serum glucose levels during combined pituitary stimulation test.

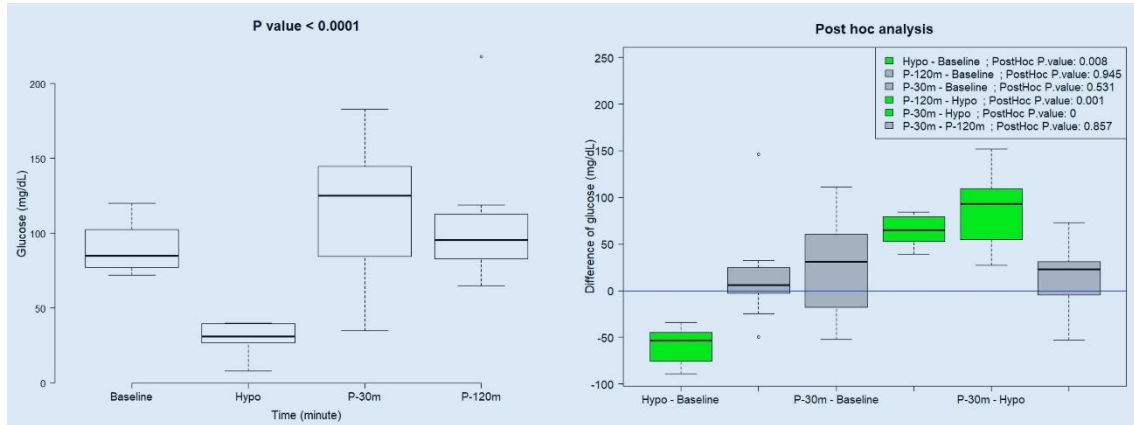

P value was attained by Friedman test. Hypo, at hypoglycemia; P-30m, at 30 minutes after hypoglycemia; P-120m, at 120 minutes after hypoglycemia.

Supplemental Fig. 2. T wave changes in lead II during combined pituitary stimulation test.

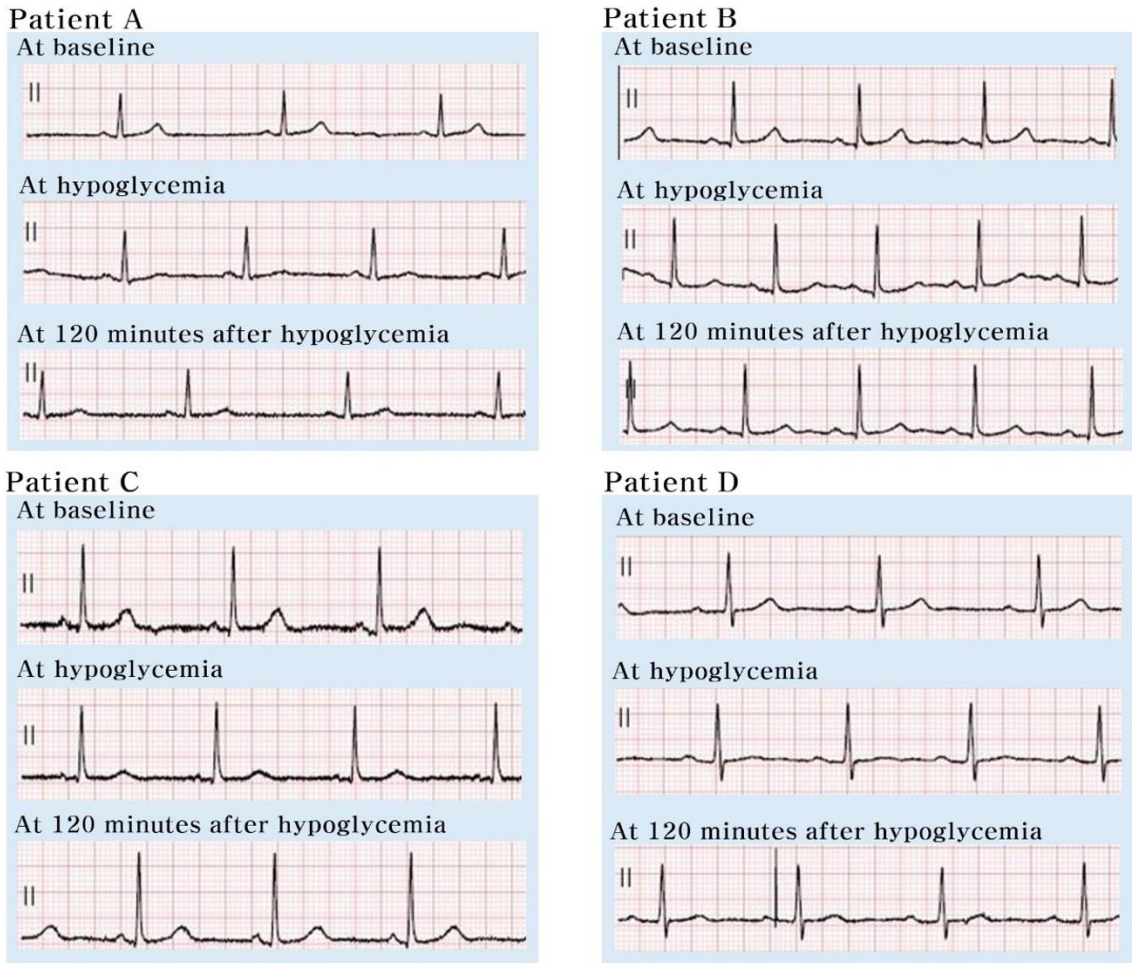

Patient A, B, C, and D indicate an individual enrolled subject

Supplemental Fig. 3. Changes in QRS duration, PR interval, and QT interval during combined pituitary stimulation test.

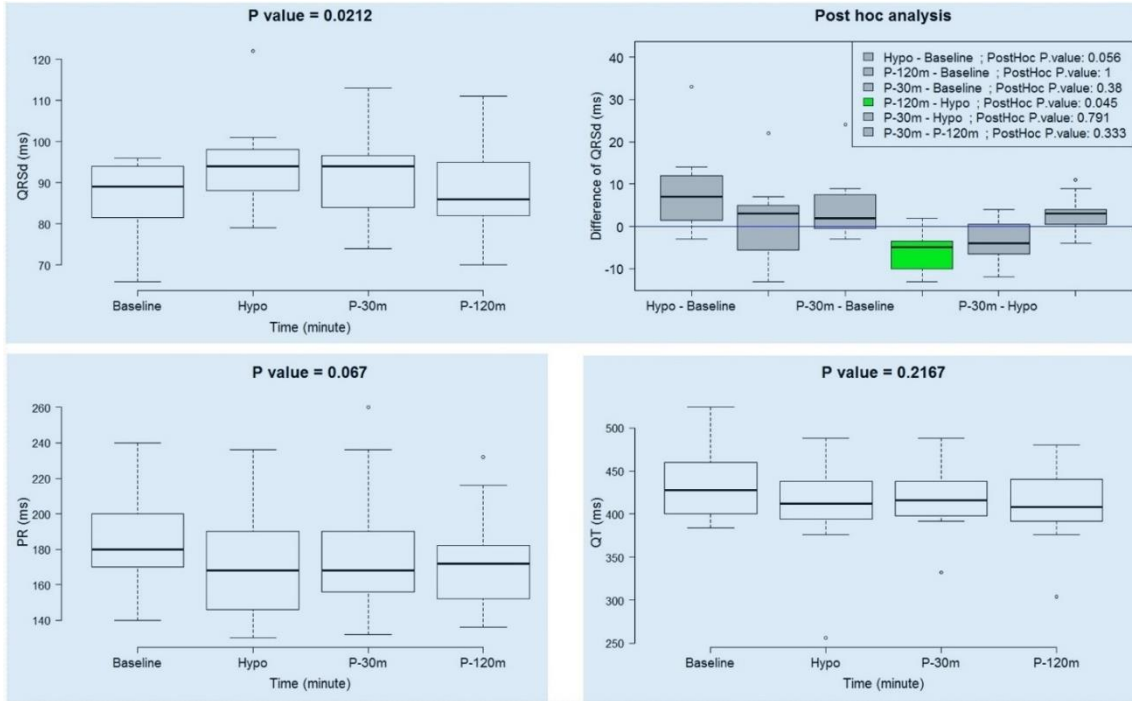

P-value was calculated by Friedman test. Hypo, hypoglycemia; P-30m, 30 minutes after hypoglycemia; P-120m, 120 minutes after hypoglycemia.
